# Supplementary material for: First principles modeling of Mo6S9 nanowires via condensation of Mo4S6 clusters and the effect of iodine doping on structural and electronic properties
Source: Royal Society of Chemistry journal article supplement (doi:10.1039/c5cp06085k), 2016-01-01
Supplement: c5cp06085k1.pdf [file c5cp06085k1.pdf]

## Supplementary Information

### First Principles Modeling of $\text{Mo}_6\text{S}_9$ Nanowire *via* Condensation of $\text{Mo}_4\text{S}_6$ Clusters and Effect of Iodine Doping on Structural and Electronic Properties

Iflah Laraib,<sup>a†</sup> J. Karthikeyan,<sup>a†</sup> P. Murugan<sup>a\*</sup>

Functional Materials Division, CSIR – Central Electrochemical Research Institute, Karaikudi–630 003, Tamil Nadu, India.

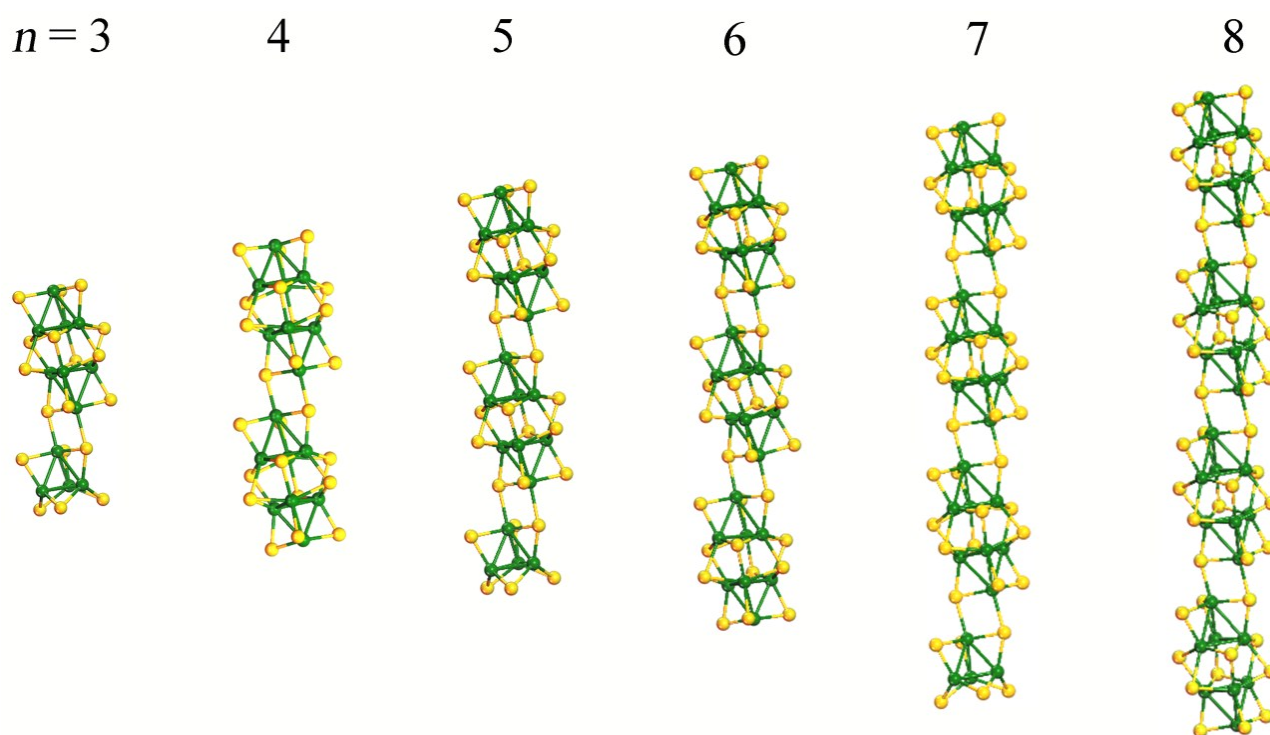

Figure S1. Optimized structures of  $(\text{Mo}_4\text{S}_6)_n$  finite nanorods.

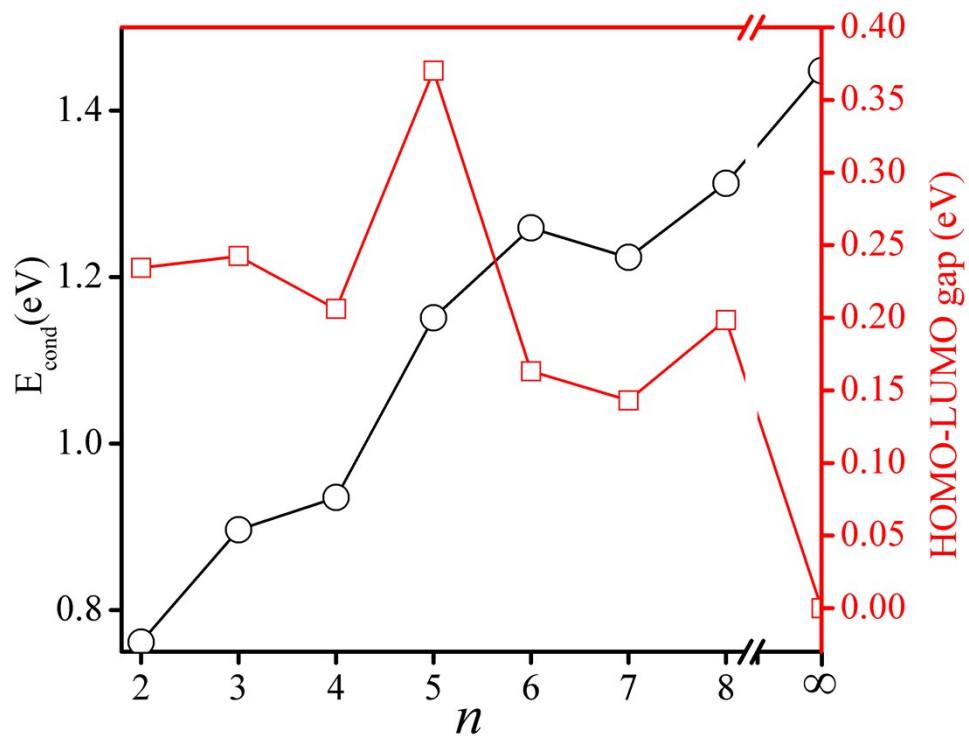

Figure S2.  $E_{\text{cond}}$  and HOMO-LUMO gap of  $(\text{Mo}_4\text{S}_6)_n$  nanorods and those values are compared with infinite NW.

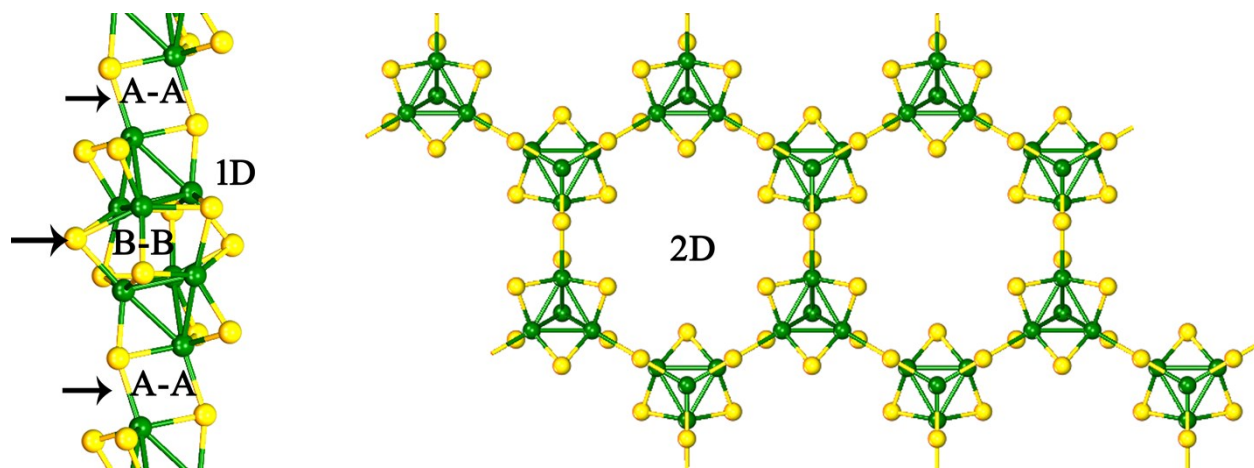

Figure S3. Optimized structures of pristine 1D NW and 2D hexagonal assembly.

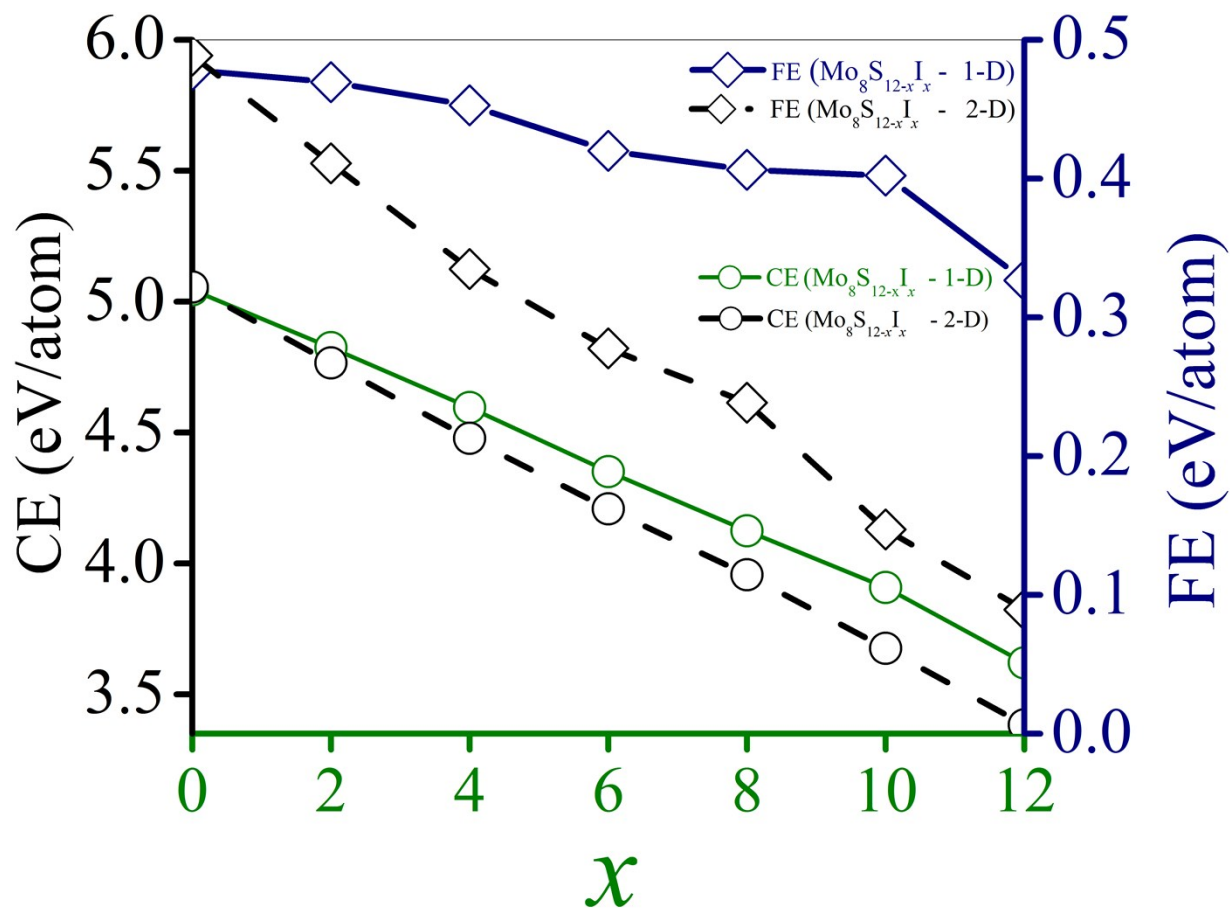

Figure S4. FE and CE of  $\text{Mo}_8\text{S}_{12-x}\text{I}_x$  1-D and 2-D assemblies.

The hexagonal 2-D assembly is constructed by condensing  $\text{Mo}_4\text{S}_6$  clusters via A-A bridge. Note that the pristine form of this assembly is more stable, by 19 meV/atom, as compared to 1-D assembly. However, iodine doping increases the relative stability of 1-D assembly, comparing the 2D assembly, due to increasing more number of Mo-Mo bonding. On the other hand, if two  $\text{Mo}_4\text{S}_6$  clusters are condensed by forming bonds via B-B bridge, by considering the maximum Mo-S bond formation, the best way to connect

next unit is through the corner Mo atoms, which obviously leads to 1D NW. This clearly shows that lesser possibility to form 2D sheets.

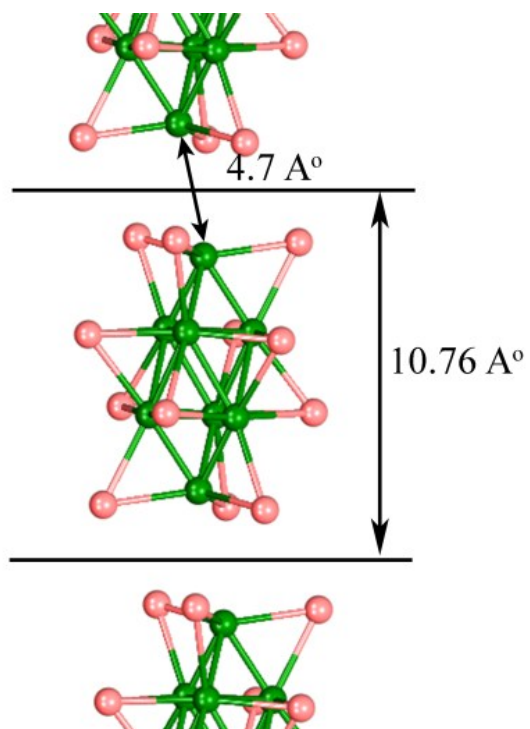

Figure S5. Optimized structure of Mo<sub>8</sub>I<sub>12</sub> NW. It is noticed that dodecahedron clusters are weakly connected.

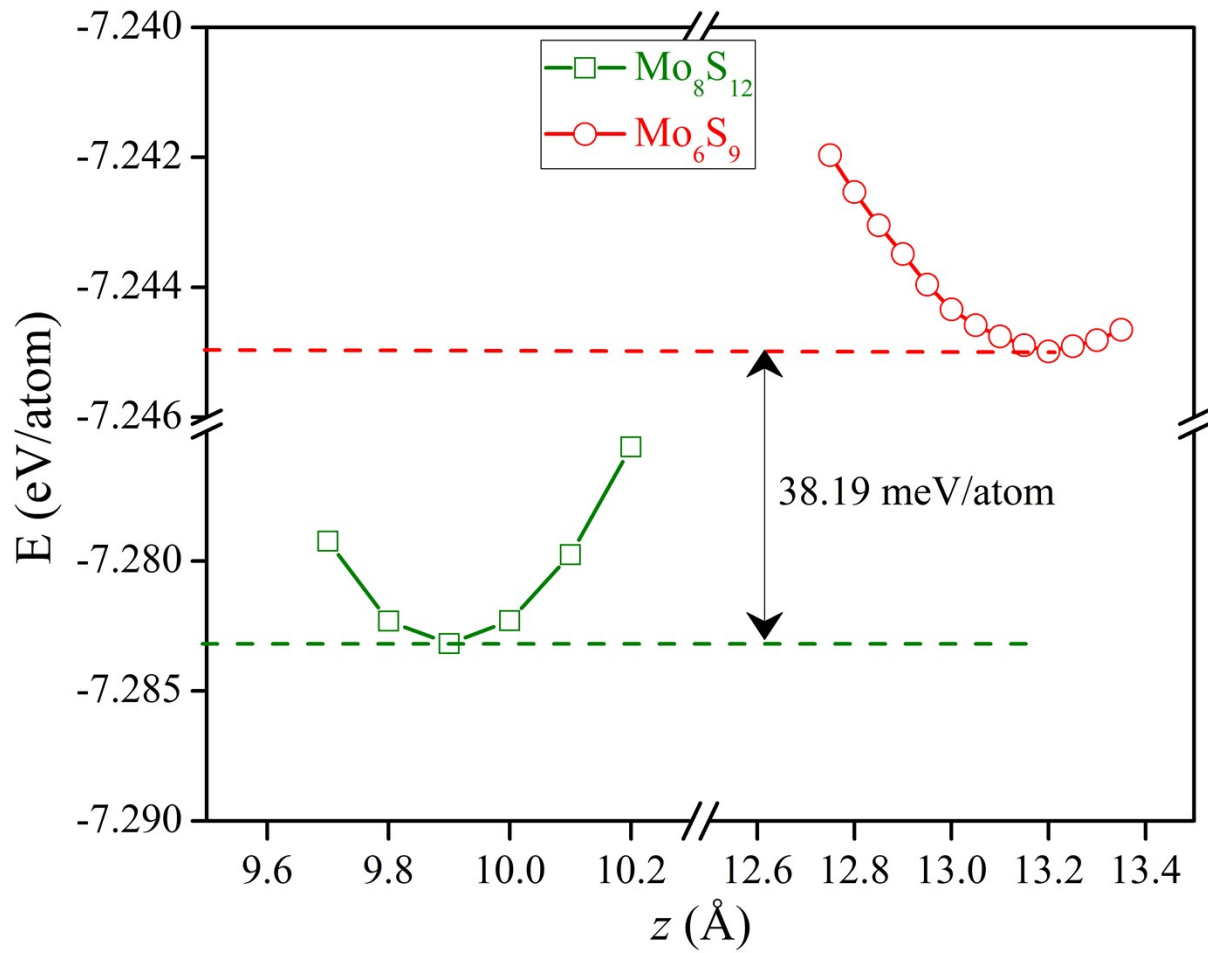

Figure S6. Plot of total energy per atom (E) vs. lattice parameter (z) for Mo<sub>8</sub>S<sub>12</sub> and Mo<sub>6</sub>S<sub>9</sub> NWs
